# Supplementary material
Source: publisher site journal article supplement (https://www.dovepress.com/article/94878)
Supplement: Supplementary file 1 [file get_supplementary_file.php]

**Supplementary Files**  
**DIAB-Q English version**

For each question, please circle the one number that best represents you today.

**Section I.** This section asks you about your exercise habits in the past 7 days and your plans to be more physically active in the next 7 days. Exercise can include aerobic exercise, strength or resistance training, flexibility or stretching exercises, and activities of daily living (such as choosing to take the stairs instead of the elevator).

1. How many days have you **exercised** in the past 7 days?

|      |     |      |      |      |      |      |           |
|------|-----|------|------|------|------|------|-----------|
| 0    | 1   | 2    | 3    | 4    | 5    | 6    | 7         |
| days | day | days | days | days | days | days | every day |

2. My desire to **exercise** in the next 7 days can be described as...

|                                          |   |   |         |   |   |                                      |
|------------------------------------------|---|---|---------|---|---|--------------------------------------|
| Very strong<br>desire NOT<br>to exercise |   |   | Neutral |   |   | Very strong<br>desire to<br>exercise |
| 1                                        | 2 | 3 | 4       | 5 | 6 | 7                                    |

3. I have made specific plans to **exercise** in the next 7 days.

|                      |          |                      |                                  |                   |       |                   |
|----------------------|----------|----------------------|----------------------------------|-------------------|-------|-------------------|
| Strongly<br>disagree | Disagree | Somewhat<br>disagree | Neither<br>agree nor<br>disagree | Somewhat<br>agree | Agree | Strongly<br>agree |
| 1                    | 2        | 3                    | 4                                | 5                 | 6     | 7                 |

4. When I think about taking care of my diabetes, for me, to **exercise** is...

|                        |   |   |         |   |   |                       |
|------------------------|---|---|---------|---|---|-----------------------|
| Not at all<br>valuable |   |   | Neutral |   |   | Extremely<br>valuable |
| 1                      | 2 | 3 | 4       | 5 | 6 | 7                     |

5. My family, friends, or health care professionals expect me to **exercise** in the next 7 days.

|                     |       |                   |         |                  |      |                    |
|---------------------|-------|-------------------|---------|------------------|------|--------------------|
| Completely<br>false | False | Somewhat<br>false | Neutral | Somewhat<br>true | True | Completely<br>true |
| 1                   | 2     | 3                 | 4       | 5                | 6    | 7                  |

6. It is mostly up to me whether or not I **exercise** in the next 7 days.

|                      |          |                      |                                  |                   |       |                   |
|----------------------|----------|----------------------|----------------------------------|-------------------|-------|-------------------|
| Strongly<br>disagree | Disagree | Somewhat<br>disagree | Neither<br>agree nor<br>disagree | Somewhat<br>agree | Agree | Strongly<br>agree |
| 1                    | 2        | 3                    | 4                                | 5                 | 6     | 7                 |

**Section II.** This section asks you about your diet in relation to your diabetes. For most people, a “diabetes diet” means eating a variety of healthy foods in sensible amounts and sticking to regular mealtimes.

7. How many days have you **followed your diabetes diet** in the past 7 days?

|      |     |      |      |      |      |      |           |
|------|-----|------|------|------|------|------|-----------|
| 0    | 1   | 2    | 3    | 4    | 5    | 6    | 7         |
| days | day | days | days | days | days | days | every day |

8. My desire to **follow my diabetes diet** in the next 7 days can be described as...

|                                                            |   |   |         |   |   |                                                        |
|------------------------------------------------------------|---|---|---------|---|---|--------------------------------------------------------|
| Very strong<br>desire NOT<br>to follow my<br>diabetes diet |   |   | Neutral |   |   | Very strong<br>desire to<br>follow my<br>diabetes diet |
| 1                                                          | 2 | 3 | 4       | 5 | 6 | 7                                                      |

9. I have made specific plans to **follow my diabetes diet** in the next 7 days.

|                      |          |                      |                                  |                   |       |                   |
|----------------------|----------|----------------------|----------------------------------|-------------------|-------|-------------------|
| Strongly<br>disagree | Disagree | Somewhat<br>disagree | Neither<br>agree nor<br>disagree | Somewhat<br>agree | Agree | Strongly<br>agree |
| 1                    | 2        | 3                    | 4                                | 5                 | 6     | 7                 |

10. When I think about taking care of my diabetes, for me, to **follow my diabetes diet** is...

|                        |   |   |         |   |   |                       |
|------------------------|---|---|---------|---|---|-----------------------|
| Not at all<br>valuable |   |   | Neutral |   |   | Extremely<br>valuable |
| 1                      | 2 | 3 | 4       | 5 | 6 | 7                     |

11. My family, friends, or health care professionals expect me to **follow my diabetes diet** in the next 7 days.

|                     |       |                   |         |                  |      |                    |
|---------------------|-------|-------------------|---------|------------------|------|--------------------|
| Completely<br>false | False | Somewhat<br>false | Neutral | Somewhat<br>true | True | Completely<br>true |
| 1                   | 2     | 3                 | 4       | 5                | 6    | 7                  |

12. It is mostly up to me whether or not I **follow my diabetes diet** in the next 7 days.

|                      |          |                      |                                  |                   |       |                   |
|----------------------|----------|----------------------|----------------------------------|-------------------|-------|-------------------|
| Strongly<br>disagree | Disagree | Somewhat<br>disagree | Neither<br>agree nor<br>disagree | Somewhat<br>agree | Agree | Strongly<br>agree |
| 1                    | 2        | 3                    | 4                                | 5                 | 6     | 7                 |

**Section III.** This section asks you about your body weight and any plans you may have for losing some weight or for maintaining a healthy weight.

13. My desire to **lose some weight** can be described as...

|                                                     |   |   |         |   |   |                                                 |
|-----------------------------------------------------|---|---|---------|---|---|-------------------------------------------------|
| Very strong<br>desire NOT<br>to lose some<br>weight |   |   | Neutral |   |   | Very strong<br>desire to<br>lose some<br>weight |
| 1                                                   | 2 | 3 | 4       | 5 | 6 | 7                                               |

14. I have made specific plans to **lose some weight**.

|                      |          |                      |                                  |                   |       |                   |
|----------------------|----------|----------------------|----------------------------------|-------------------|-------|-------------------|
| Strongly<br>disagree | Disagree | Somewhat<br>disagree | Neither<br>agree nor<br>disagree | Somewhat<br>agree | Agree | Strongly<br>agree |
| 1                    | 2        | 3                    | 4                                | 5                 | 6     | 7                 |

15. When I think about taking care of my diabetes, for me, to **lose some weight** is...

|                        |   |   |         |   |   |                       |
|------------------------|---|---|---------|---|---|-----------------------|
| Not at all<br>valuable |   |   | Neutral |   |   | Extremely<br>valuable |
| 1                      | 2 | 3 | 4       | 5 | 6 | 7                     |

16. My family, friends, or health care professionals expect me to **lose some weight**.

|                     |       |                   |         |                  |      |                    |
|---------------------|-------|-------------------|---------|------------------|------|--------------------|
| Completely<br>false | False | Somewhat<br>false | Neutral | Somewhat<br>true | True | Completely<br>true |
| 1                   | 2     | 3                 | 4       | 5                | 6    | 7                  |

17. It is mostly up to me whether or not I **lose some weight**.

|                      |          |                      |                                  |                   |       |                   |
|----------------------|----------|----------------------|----------------------------------|-------------------|-------|-------------------|
| Strongly<br>disagree | Disagree | Somewhat<br>disagree | Neither<br>agree nor<br>disagree | Somewhat<br>agree | Agree | Strongly<br>agree |
| 1                    | 2        | 3                    | 4                                | 5                 | 6     | 7                 |

Note: Use of the DIAB-Q requires permission from the copyright holder, Janssen Research & Development, LLC.

**Supplementary file 2. Correlations between items hypothesized to measure similar constructs**

| <b>DIAB-Q item</b>                                                                | <b>Correlations with</b> |                                                                                                                                                                                                                 | <b>Results of correlation</b>          |                |
|-----------------------------------------------------------------------------------|--------------------------|-----------------------------------------------------------------------------------------------------------------------------------------------------------------------------------------------------------------|----------------------------------------|----------------|
|                                                                                   | <b>Instrument</b>        | <b>Item</b>                                                                                                                                                                                                     | <b>Pearson correlation coefficient</b> | <b>P value</b> |
| How many days have you exercised in the past 7 days (item 1)                      | SDSCA                    | On how many of the last SEVEN DAYS did you participate in at least 30 minutes of physical activity? (“Exercise” section)                                                                                        | 0.84                                   | <0.01          |
|                                                                                   | SDSCA                    | On how many of the last SEVEN DAYS did you participate in a specific exercise session (such as swimming, walking, biking) other than what you do around the house or as part of your work? (“Exercise” section) | 0.80                                   | <0.01          |
| I have made specific plans to exercise in the next 7 days (item 3)                | MDQ                      | How confident are you in your ability to exercise regularly? (section 3, item 3)                                                                                                                                | 0.62                                   | <0.01          |
| How many days have you followed your diabetes diet in the past 7 days (item 7)    | SDSCA                    | How many of the last SEVEN DAYS have you followed a healthful eating plan? (“Diet” section)                                                                                                                     | 0.78                                   | <0.01          |
|                                                                                   | SDSCA                    | On average, over the past month, how many DAYS PER WEEK have you followed your eating plan? (“Diet” section)                                                                                                    | 0.80                                   | <0.01          |
| I have made specific plans to follow my diabetes diet in the next 7 days (item 9) | MDQ                      | How confident are you in your ability to follow your diet? (section 3, item 1)                                                                                                                                  | 0.60                                   | <0.01          |

DIAB-Q, Diabetes Intention, Attitude, and Behavior Questionnaire; SDSCA, Summary of

Diabetes Self-Care Activities; MDQ, Multidimensional Diabetes Questionnaire.

### Supplementary file 3. Distribution-based estimates of MCIC

| Item               | Mean ± SD<br>all patients, baseline<br>(N = 1015) | Mean ± SD change in<br>stable patients<br>(n = 529) | ICC<br>(n = 529) | MCIC    |         |        |
|--------------------|---------------------------------------------------|-----------------------------------------------------|------------------|---------|---------|--------|
|                    |                                                   |                                                     |                  | 1.0 SEM | 0.5 SES | 0.5 RS |
| Subjective<br>Norm | 66.9 ± 21.0                                       | -1.6 ± 16.3                                         | 0.706            | 11.4    | 10.5    | 8.2    |
| Attitude           | 76.4 ± 17.7                                       | 0.5 ± 10.9                                          | 0.806            | 7.8     | 8.9     | 5.5    |
| PBC                | 86.6 ± 14.2                                       | -0.5 ± 11.7                                         | 0.630            | 8.6     | 7.1     | 5.9    |
| Intention          | 66.5 ± 19.0                                       | 1.0 ± 12.3                                          | 0.778            | 9.0     | 9.5     | 6.2    |
| Planning           | 58.2 ± 22.8                                       | 1.3 ± 12.8                                          | 0.833            | 9.3     | 11.4    | 6.4    |
| Behavior           | 51.3 ± 24.6                                       | -0.6 ± 13.4                                         | 0.837            | 9.9     | 12.3    | 6.7    |

MCIC, minimal clinically important change; SD, standard deviation; ICC, intra-class correlation coefficient; SEM, standard error of measurement; SES, standard effect size; RS, responsiveness statistic; PBC, Perceived Behavioral Control.
